# Supplementary material
Source: HighWire-hosted journal article supplement (https://sti.bmj.com/content/94/8/598)
Supplement: inline-supplementary-material-1 [file inline-supplementary-material-1.docx]

**Web Only Appendix**

**W1.** Anhang R, Nelson JA, Telerant R, et al. Acceptability of self-collection of specimens for HPV DNA testing in an urban population. *J Womens Health* 2005;14(8):721-728.

**W2.** Westergaard RP, Hess T, Astemborski J, et al. Longitudinal changes in engagement in care and viral suppression for HIV-infected injection drug users. *AIDS.* 2013;27(16):2559-2566.

**W3.** Mehta SH, Genberg BL, Astemborski J, et al. Limited Uptake of Hepatitis C Treatment Among Injection Drug Users. *J Community Health.* 2007;33(3):126.

**W4.** Kissinger P, Mohammed H, Richardson-Alston G, et al. Patient-delivered partner treatment for male urethritis: a randomized, controlled trial. *Clin Infect Dis.* 2005;41(5):623-629.

**W5.** Kissinger P, Schmidt N, Mohammed H, et al. Patient-delivered partner treatment for Trichomonas vaginalis infection: a randomized controlled trial. *Sex Transm Dis.* 2006;33(7):445-450.

**W6.** Nakamura N, Semple SJ, Strathdee SA, et al. Methamphetamine initiation among HIV-positive gay and bisexual men. *AIDS Care.* 2009;21(9):1176-1184.

**W7.** Kral AH, Lorvick J, Ciccarone D, et al. HIV prevalence and risk behaviours among men who have sex with men and inject drugs in San Francisco. *J Urban Health.* 2005;82(1 Suppl 1):i43-50.

**W8.** Bull SS, Piper P, Rietmeijer C. Men who have sex with men and also inject drugs-profiles of risk related to the synergy of sex and drug injection behaviours. *J Homosex.* 2002;42(3):31-51.
